# Supplementary material
Source: PubMed Central journal article supplement (PMC5321482)

Supplementary Figure 1

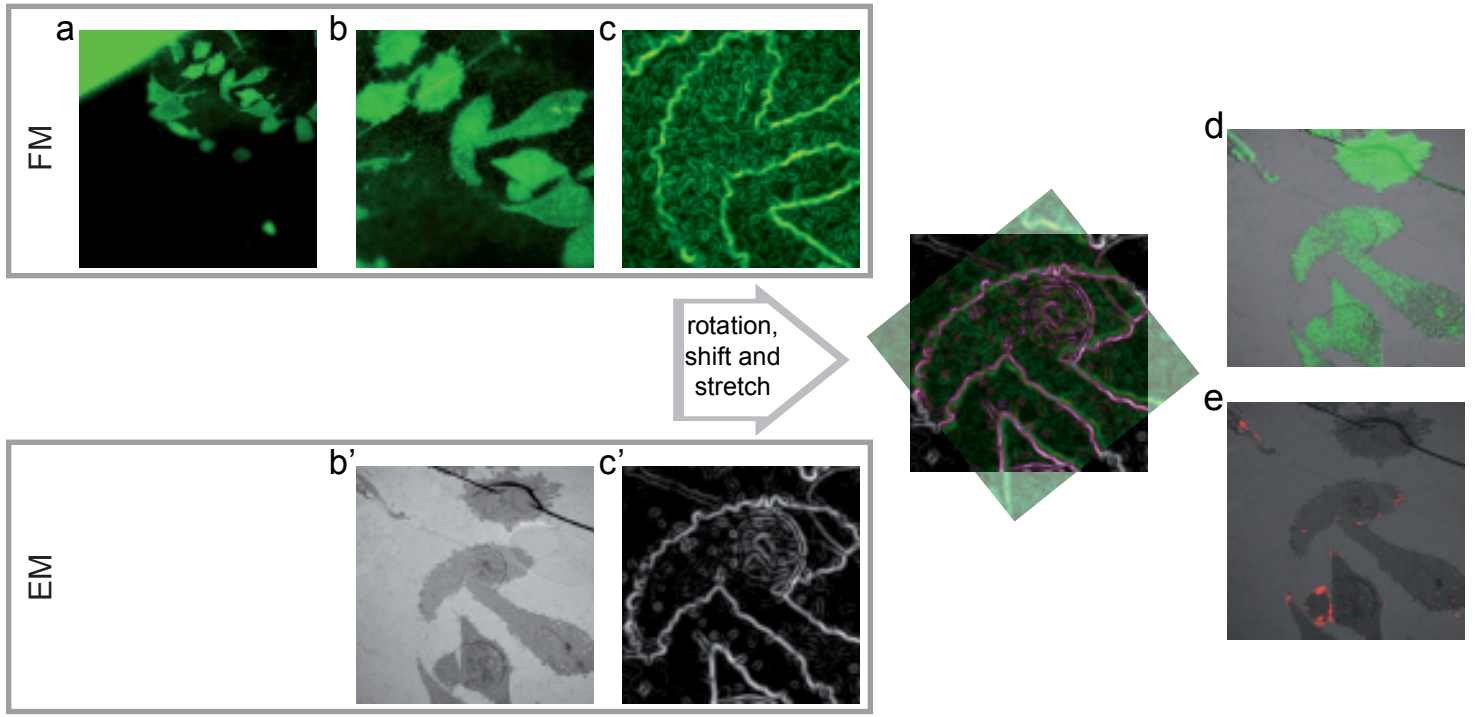

Supplement: NIHMS68496-supplement-Supplementary_figure_1.pdf [file NIHMS68496-supplement-Supplementary_figure_1.pdf]

Supplementary figure 2

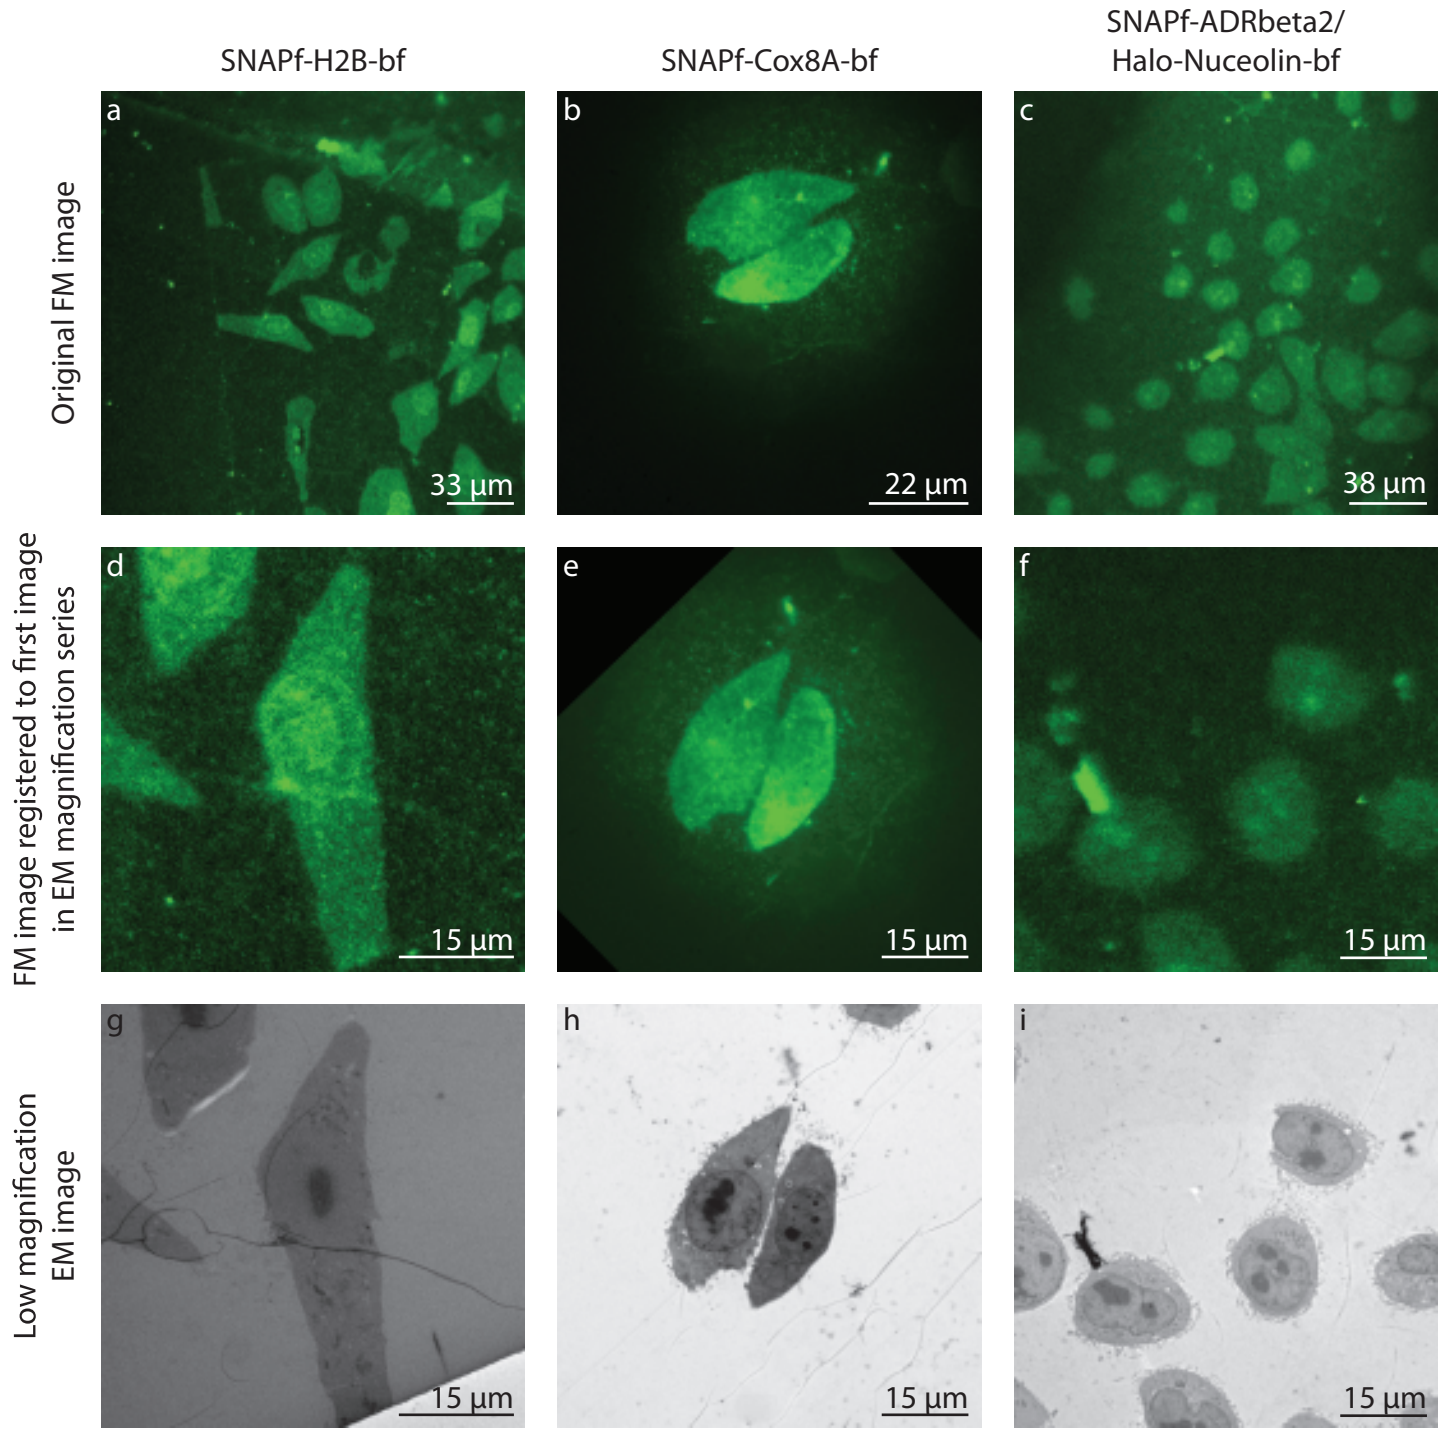

Supplement: NIHMS68496-supplement-Supplementary_figure_2.pdf [file NIHMS68496-supplement-Supplementary_figure_2.pdf]
